# Supplementary material for: Retrospective Analysis of the Psychological Predictors of Public Health Support in Bulgarians at the Beginning of the Coronavirus Pandemic
Source: MDPI journal article supplement (doi:10.3390/brainsci13050821), 2023-05-19
Supplement: s1 [file s1]

## Research Methodology

### Global survey by project “International Collaboration on the Social & Moral Psychology of COVID-19”

Authors: Jay Van Bavel, Mark Alfano, Paulo Sérgio Boggio, Valerio Capraro, Aleksandra Cichocka, Aleksandra Cislak and Hallgeir Sjøstad

#### References:

Azevedo, Flavio, Tomislav Pavlović, Gabriel G. d. Rêgo, F. C. Ay, Biljana Gjoneska, Tom Etienne, Robert M. Ross, et al. 2022. Social and moral psychology of COVID-19 across 69 countries. *PsyArXiv*. Accessed March 27, 2023. <https://doi.org/10.31234/osf.io/a3562>

ICSMP. An International Collaboration on the Social & Moral Psychology of COVID-19. Home page. Accessed March 27, 2023. <https://icsmp-covid19.netlify.app/index.html>

### COVID-19 Many Lab Study – Bulgaria

#### Physical contact

##### Be as accurate as you can:

During the days of the coronavirus (COVID-19) pandemic, I have been ...

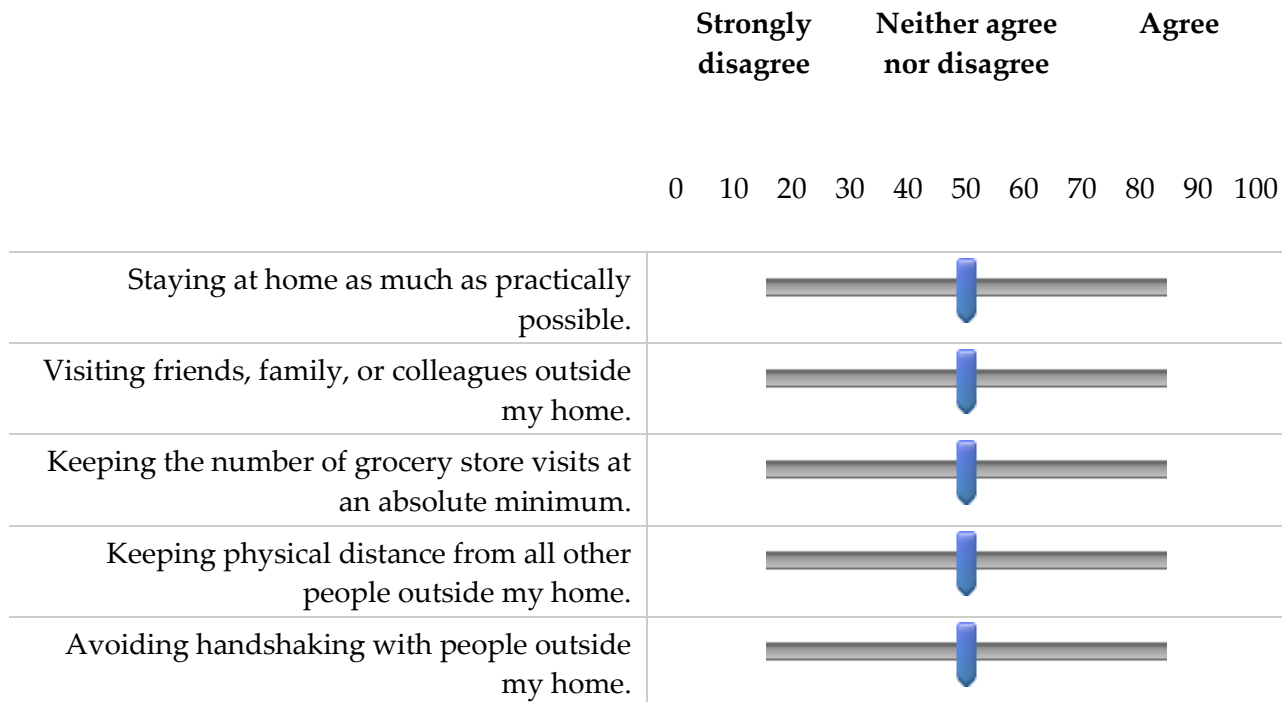

## Physical hygiene

**Be as accurate as you can:** During the days of the coronavirus (COVID-19) pandemic, I have been ...

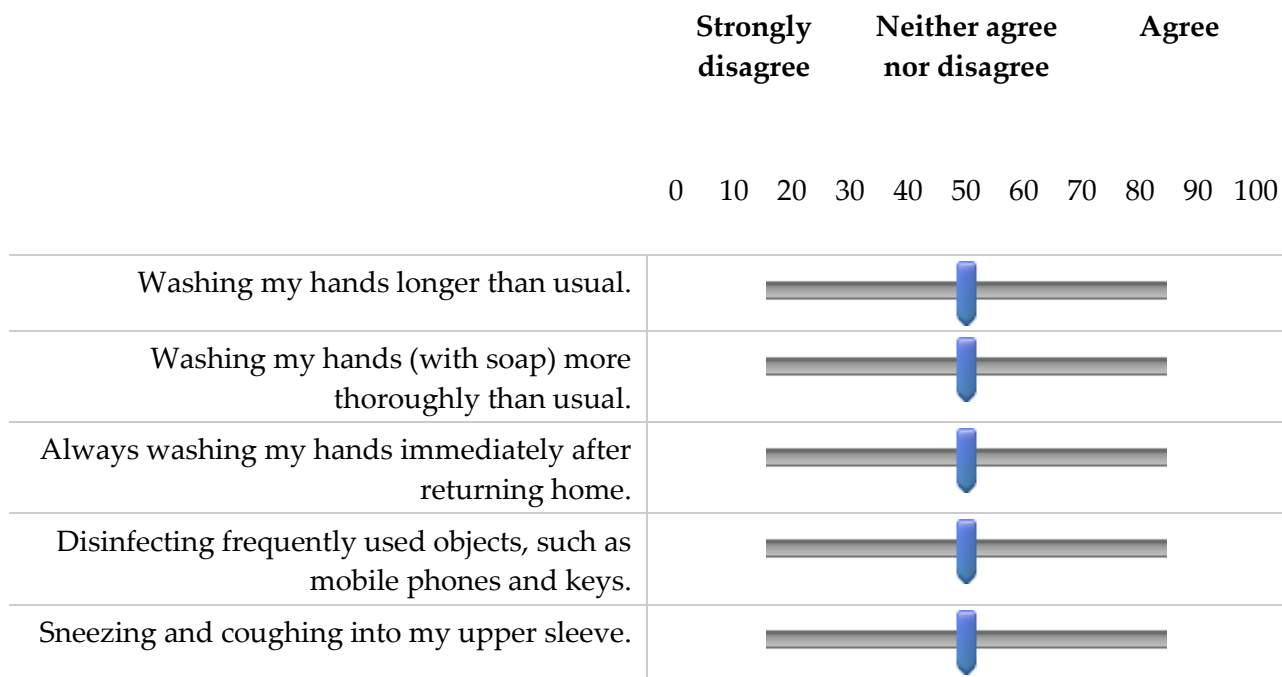

## Anti-corona policy support

**Be as accurate as you can:** During the days of the coronavirus (COVID-19) pandemic, I have been ...

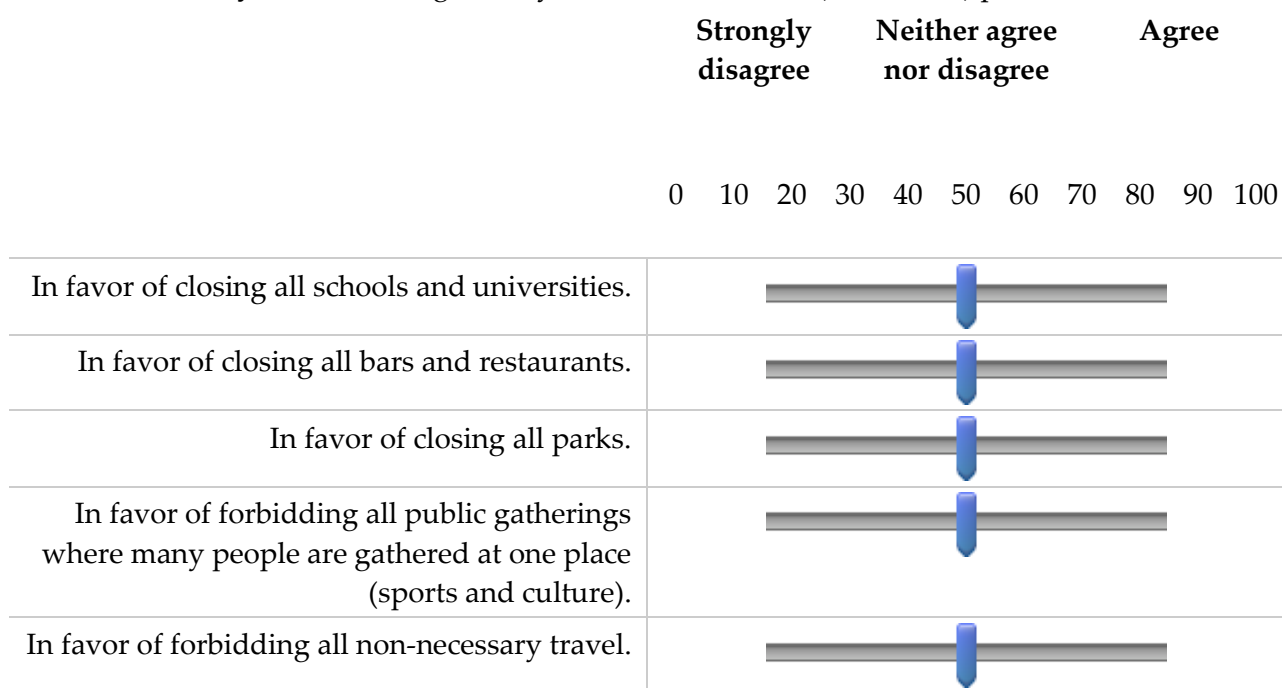

**End of Block: Anti-corona policy support**

## Psychological well-being

In general, to what extent do you feel happy these days?

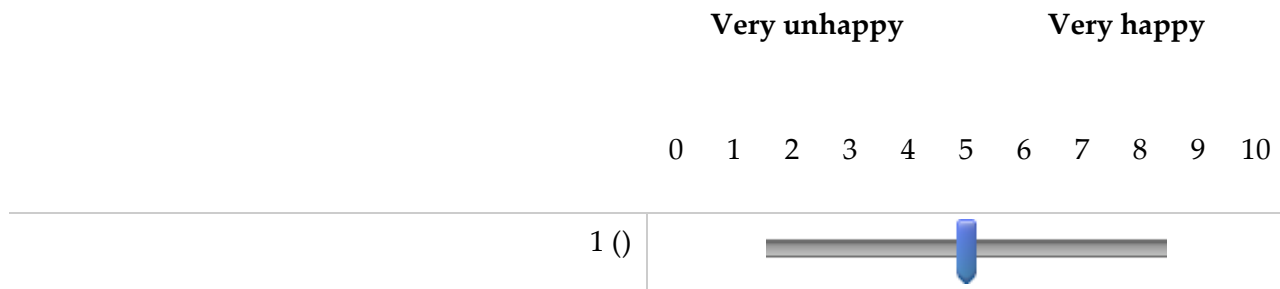

Please imagine a ladder, with steps numbered 0 at the bottom and 10 at the top. The top represents the best possible life for you, and the bottom represents the worst possible life for you. On which step of the ladder would you say you personally feel you stand at this time?

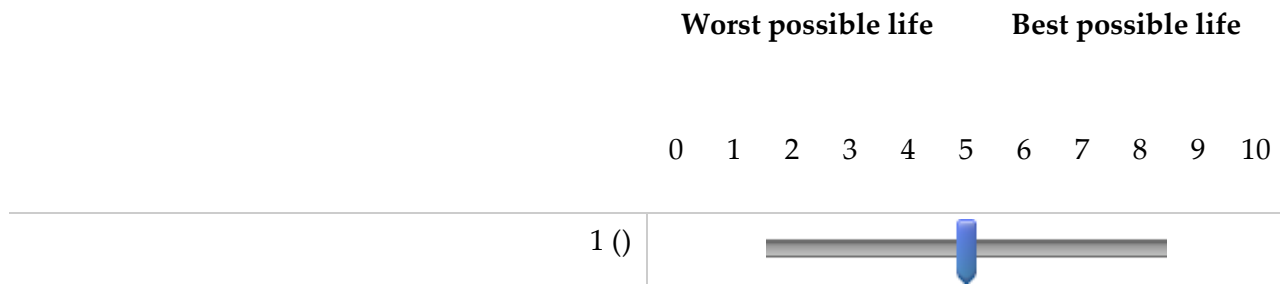

## Collective narcissism

For each of the following statements, please select the answer that best describes whether you agree or disagree.

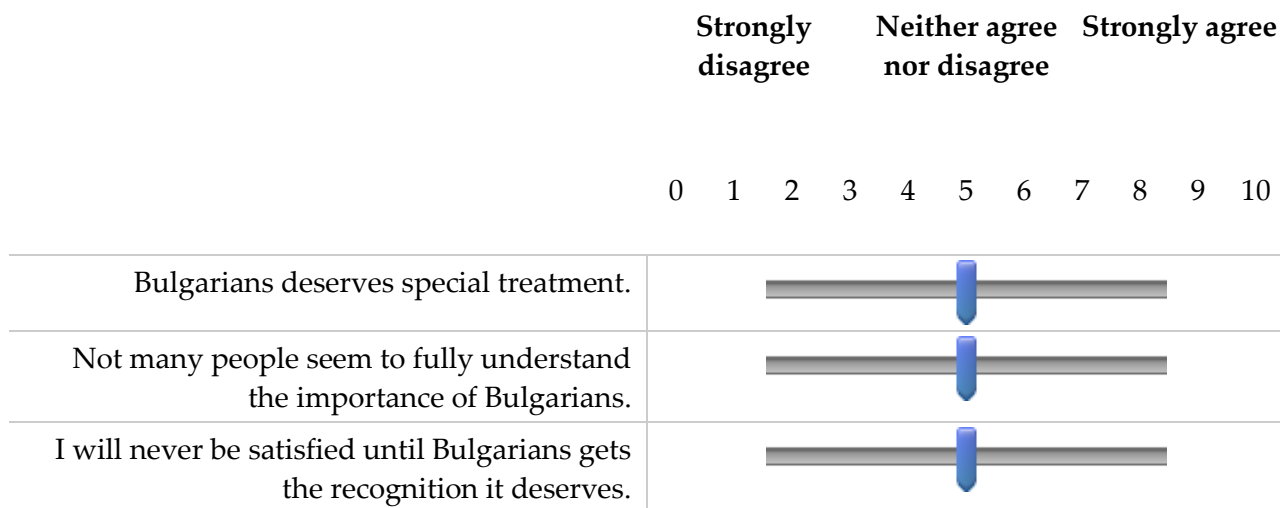

## National Identification

For each of the following statements, please select the answer that best describes whether you agree or disagree.

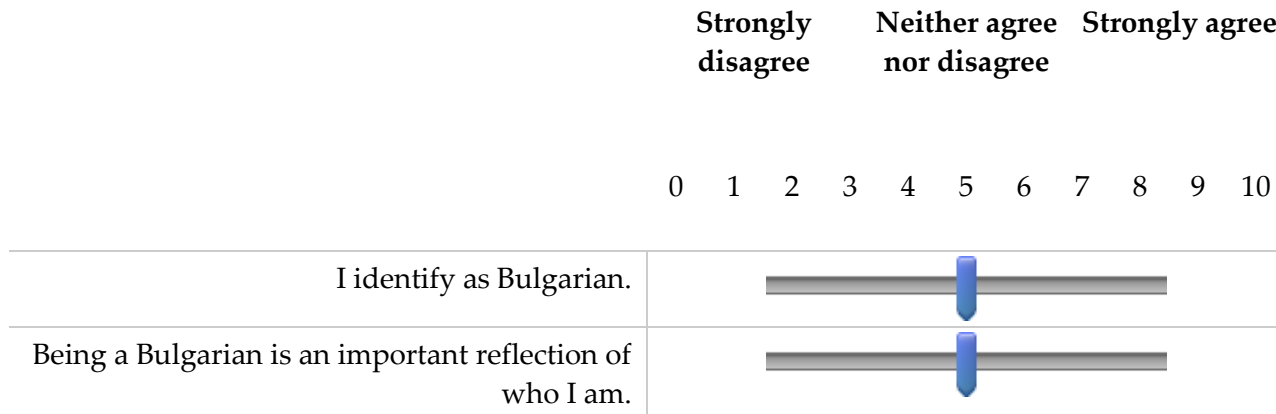

## Conspiracy Theories COVID-19

For each of the following statements, please select the answer that best describes whether you agree or disagree.

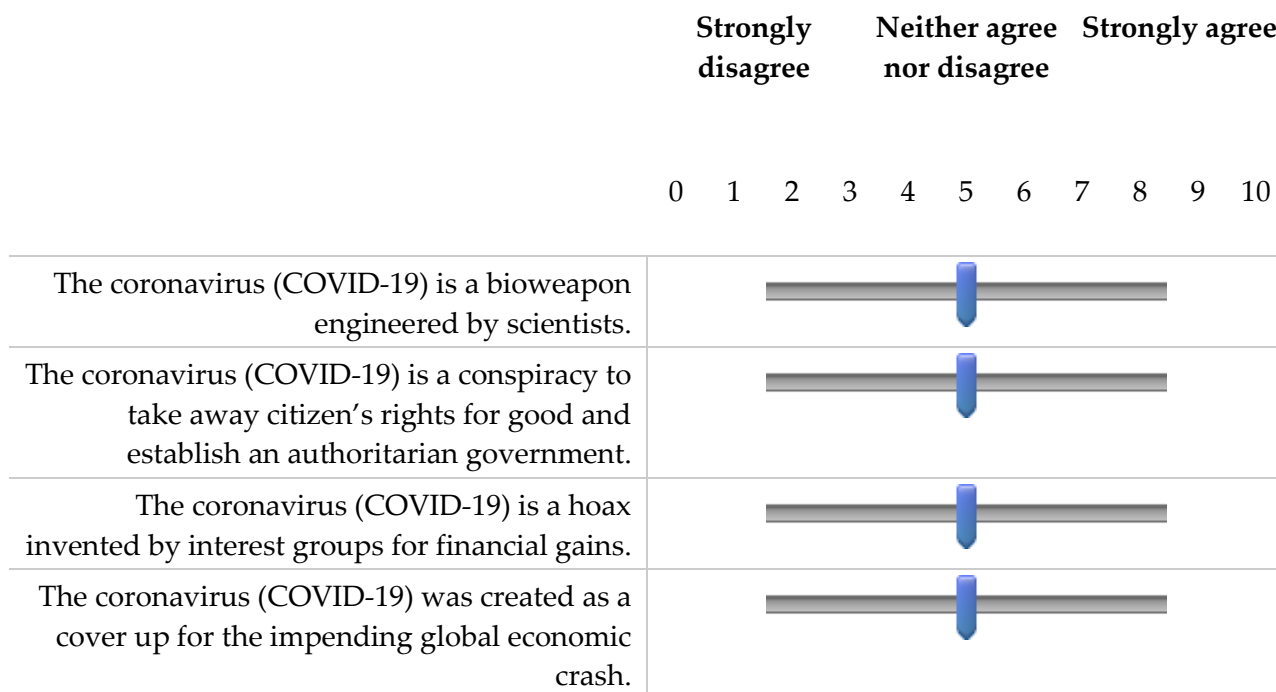

## Open-mindedness

For each of the following statements, please select the answer that best describes whether you agree or disagree.

|                                                                                                                | Strongly disagree | Neither agree nor disagree | Strongly agree |   |   |   |   |   |   |   |    |
|----------------------------------------------------------------------------------------------------------------|-------------------|----------------------------|----------------|---|---|---|---|---|---|---|----|
|                                                                                                                | 0                 | 1                          | 2              | 3 | 4 | 5 | 6 | 7 | 8 | 9 | 10 |
| I think that paying attention to people who disagree with me is a waste of time.                               |                   |                            |                |   |   |   |   |   |   |   |    |
| I feel no shame learning from someone who knows more than me.                                                  |                   |                            |                |   |   |   |   |   |   |   |    |
| If I do not know much about some topic, I don't mind being taught about it, even if I know about other topics. |                   |                            |                |   |   |   |   |   |   |   |    |
| Even when I have high status, I don't mind learning from others who have lower status.                         |                   |                            |                |   |   |   |   |   |   |   |    |
| Only wimps admit that they've made mistakes.                                                                   |                   |                            |                |   |   |   |   |   |   |   |    |
| I don't take people seriously if they're very different from me.                                               |                   |                            |                |   |   |   |   |   |   |   |    |

## Morality-as-cooperation (short version)

When you decide whether something is right or wrong, to what extent are the following considerations relevant to your thinking?

|  | Strongly disagree | Neither agree nor disagree | Strongly agree |   |   |   |   |   |   |   |    |
|--|-------------------|----------------------------|----------------|---|---|---|---|---|---|---|----|
|  | 0                 | 1                          | 2              | 3 | 4 | 5 | 6 | 7 | 8 | 9 | 10 |

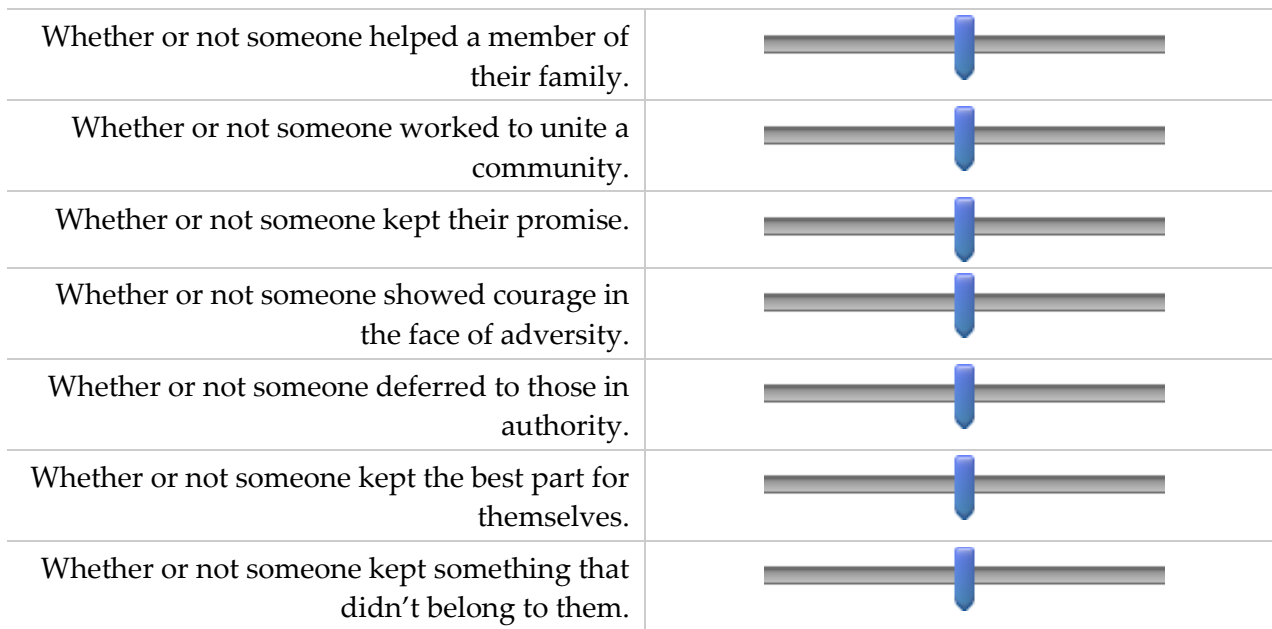

### Trait optimism

For each of the following statements, please select the answer that best describes whether you agree or disagree.

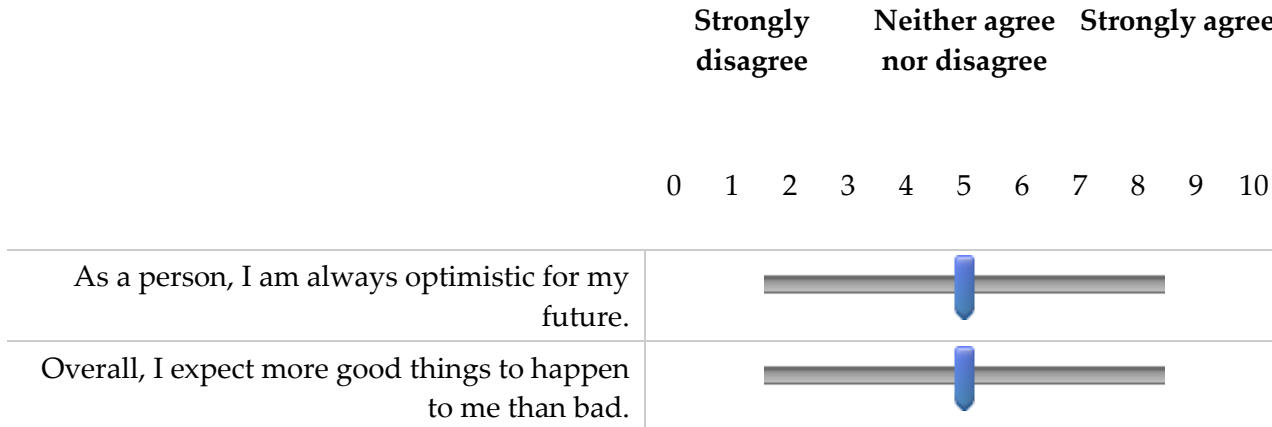

### Social belonging

For each of the following statements, please select the answer that best describes whether you agree or disagree.

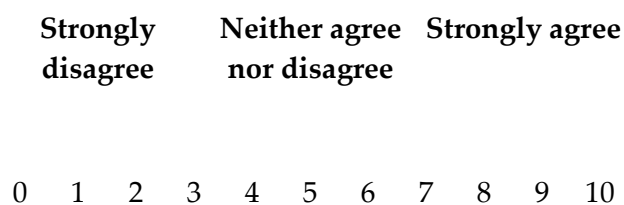

|                                               |                                                                                    |
|-----------------------------------------------|------------------------------------------------------------------------------------|
| I feel connected with others.                 |  |
| When I am with other people, I feel included. |  |
| I feel accepted by others.                    |  |
| I have close bonds with family and friends.   |  |

### Trait self-control

For each of the following statements, please select the answer that best describes whether you agree or disagree.

|                                                       | Strongly disagree                                                                    | Neither agree nor disagree | Strongly agree |   |   |   |   |   |   |   |    |
|-------------------------------------------------------|--------------------------------------------------------------------------------------|----------------------------|----------------|---|---|---|---|---|---|---|----|
|                                                       | 0                                                                                    | 1                          | 2              | 3 | 4 | 5 | 6 | 7 | 8 | 9 | 10 |
| I am good at resisting temptation.                    |  |                            |                |   |   |   |   |   |   |   |    |
| I am able to work effectively toward long-term goals. |  |                            |                |   |   |   |   |   |   |   |    |
| I have a hard time breaking bad habits.               |  |                            |                |   |   |   |   |   |   |   |    |
| I am lazy.                                            |  |                            |                |   |   |   |   |   |   |   |    |

### Narcissism

For each of the following statements, please select the answer that best describes whether you agree or disagree.

| Strongly disagree |   |   | Neither agree nor disagree |   |   |   | Strongly agree |   |   |    |
|-------------------|---|---|----------------------------|---|---|---|----------------|---|---|----|
| 0                 | 1 | 2 | 3                          | 4 | 5 | 6 | 7              | 8 | 9 | 10 |

|                                                                           |                                                                                    |
|---------------------------------------------------------------------------|------------------------------------------------------------------------------------|
| I react annoyed if another person steals the show from me.                |  |
| I deserve to be seen as a great personality.                              |  |
| I want my rivals to fail.                                                 |  |
| Being a very special person gives me a lot of strength.                   |  |
| I manage to be the center of attention with my outstanding contributions. |  |
| Most people are somehow losers.                                           |  |

## Moral Identity

Listed below are some characteristics that might describe a person: caring, compassionate, fair, friendly, generous, helpful, hardworking, honest, kind. The person with these characteristics could be you or it could be someone else. For a moment, visualize in your mind the kind of person who has these characteristics. Imagine how that person would think, feel, and act. When you have a clear image of what this person would be like, answer the following questions.

|   |                          |                                   |                       |   |   |   |   |   |   |    |
|---|--------------------------|-----------------------------------|-----------------------|---|---|---|---|---|---|----|
|   | <b>Strongly disagree</b> | <b>Neither agree nor disagree</b> | <b>Strongly agree</b> |   |   |   |   |   |   |    |
| 0 | 1                        | 2                                 | 3                     | 4 | 5 | 6 | 7 | 8 | 9 | 10 |



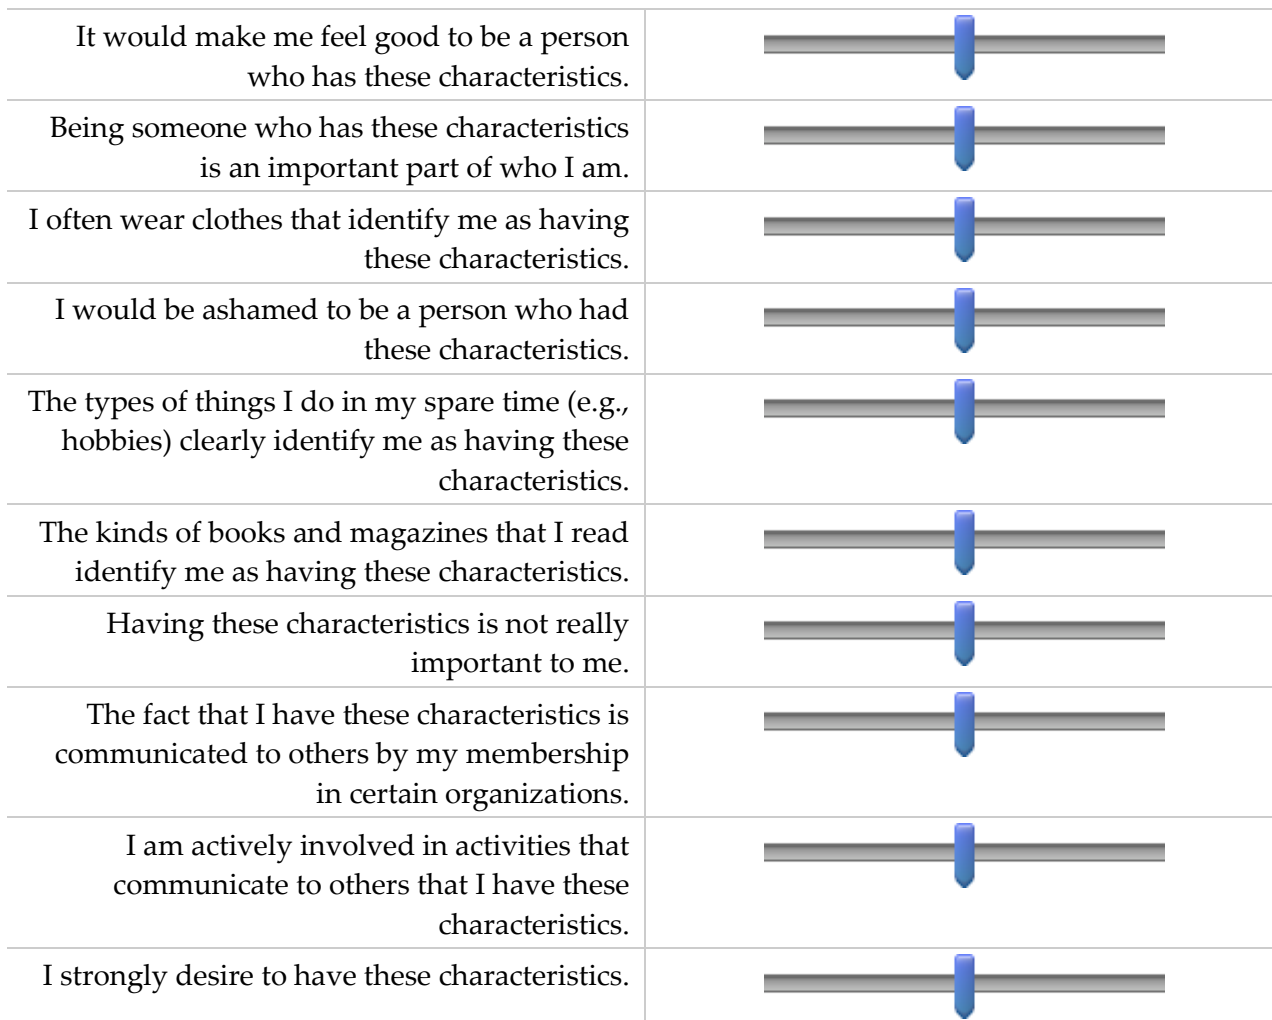

## Risk perception

Please answer the following questions as accurately as possible:

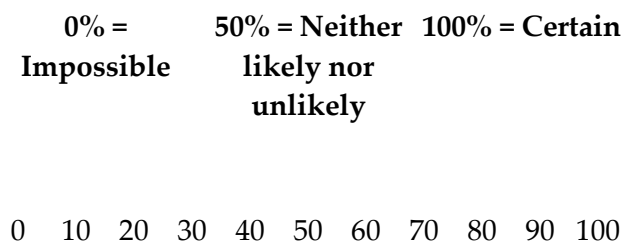

|                                                                                                                                       |                                                                                    |
|---------------------------------------------------------------------------------------------------------------------------------------|------------------------------------------------------------------------------------|
| By April 30, 2021: How likely do you think it is that you will get infected by the Coronavirus (Covid-19)?                            |  |
| By April 30, 2021: How likely do you think it is that the average person in Bulgaria will get infected by the Coronavirus (Covid-19)? |  |

**Please answer the following questions:**

What is your sex?

Male (1)

Female (2)

Other (3)

---

How old are you?

What is your current marital status?

Single (1)

In a relationship (2)

Married (3)

---

How many children do you have? If none, please type 0.

How would you describe your current employment status?

Employed full time (1)

Employed part-time (2)

Unemployed / Looking for work (3)

Student (4)

Retired (5)

Other (6)
