# Supplementary material for: Retrospective Analysis of the Psychological Predictors of Public Health Support in Bulgarians at the Beginning of the Coronavirus Pandemic
Source: MDPI journal article supplement (doi:10.3390/brainsci13050821), 2023-05-19
Supplement: s1 [file s1]

**Table S1.** Descriptive statistics

|         | PC     | PH     | ACPS   | CN    | PWB   | CT    | NI     | MC    | OM     | TO     | SB     | TSC   | N     | MI    | RP   |
|---------|--------|--------|--------|-------|-------|-------|--------|-------|--------|--------|--------|-------|-------|-------|------|
| Valid   | 725    | 723    | 724    | 728   | 731   | 727   | 727    | 728   | 727    | 732    | 727    | 726   | 724   | 709   | 717  |
| Missing | 8      | 10     | 9      | 5     | 2     | 6     | 6      | 5     | 6      | 1      | 6      | 7     | 9     | 24    | 16   |
| M       | 20.12  | 21.02  | 19.56  | 8.15  | 6.19  | 9.73  | 8.23   | 24.65 | 26.03  | 7.91   | 15.92  | 14.03 | 15.48 | 40.23 | 6.07 |
| Me      | 21.00  | 22.00  | 21.00  | 8.00  | 6.00  | 9.00  | 9.00   | 25.00 | 26.00  | 8.00   | 16.00  | 14.00 | 16.00 | 41.00 | 6.00 |
| Mo      | 22     | 25     | 25     | 3     | 8     | 4     | 10     | 24    | 26     | 8      | 16     | 14    | 14    | 41    | 6    |
| S.D.    | 3.81   | 4.05   | 5.08   | 3.45  | 1.74  | 4.83  | 1.89   | 3.07  | 3.02   | 1.70   | 2.74   | 2.79  | 4.73  | 7.72  | 1.86 |
| Skew    | -1.057 | -1.343 | -1.130 | .057  | -.126 | .431  | -1.157 | -.787 | -1.150 | -1.180 | -1.022 | -.311 | .028  | -.728 | .101 |
| K       | 1.211  | 1.538  | .669   | -.950 | -.932 | -.972 | .865   | 2.149 | 2.701  | 1.740  | 1.656  | .030  | -.447 | .597  | .107 |
| Min     | 5      | 5      | 5      | 3     | 2     | 4     | 2      | 9     | 9      | 2      | 4      | 5     | 6     | 9     | 0    |
| Max     | 25     | 25     | 25     | 15    | 10    | 20    | 10     | 33    | 30     | 10     | 20     | 20    | 30    | 55    | 10   |

\*Note: Mean-M, Median-Me, Mode-Mo, Standart Deviation-S.D., Skewness-Skew, Kurtosis-K, Minimum value-Min, Maximum value-Max, Standart deviation-S.D., Physical contact-PC, Physical hygiene-PH, Anti-Corona Policy Support-ACPS, Collective narcissism-CN, Psychological Well-being-PWB, Conspiracy Theories COVID-19-CT, National Identification-NI, Morality-as-cooperation-MC, Open-mindedness-OM, Trait Optimism-TO, Social Belonging-SB, Trait Self-control-TSC, Narcissism-N, Moral Identity-MI, Risk Perception-RP.
